# Supplementary material for: Impact of a Shorter Brine Soaking Time on Nutrient Bioaccessibility and Peptide Formation in 30-Months-Ripened Parmigiano Reggiano Cheese
Source: MDPI journal article supplement (doi:10.3390/molecules27030664), 2022-01-20
Supplement: s1 [file s1]

**Supplementary Table S1.** Fatty acid methyl esters content in conventional Parmigiano-Reggiano cheese (C-PRC) and hyposodic Parmigiano-Reggiano cheese (Hypo-PRC).

|           | <b>C-PRC</b>     | <b>Hypo-PRC</b> |
|-----------|------------------|-----------------|
| C8:0      | 216.37±16.58     | 220.90±43.74    |
| C10:0     | 552.78±28.06     | 563.87±81.72    |
| C12:0     | 684.14±29.52     | 671.87±70.75    |
| C14:0     | 2191.56±151.62   | 2120.22±115.49  |
| C16:0     | 5993.19±350.51   | 5832.99±330.59  |
| C16:1 n-7 | 350.49±14.09     | 349.37±49.00    |
| C18:0     | 1807.86±497.96   | 1789.42±295.13  |
| C18:1 n-9 | 4286.09±634.15   | 4288.07±104.86  |
| C18:2 n-6 | 505.73±124.86    | 505.97±64.26    |
| ΣSFA      | 11445.91±968.33  | 11199.26±245.87 |
| ΣMUFA     | 4636.58±624.78   | 4637.44±98.28   |
| ΣPUFA     | 505.73±124.86    | 505.97±64.26    |
| Total     | 16588.22±1709.90 | 16342.67±369.40 |

Data are means ± SD of three independent analysis and are expressed as mg of fatty acid methyl esters/100g PRC.  
Statistical analysis was by evaluated by unpaired t-test (\* at least p<0.05).
